# Supplementary material for: Inhibition of nuclear receptor RORα attenuates cartilage damage in osteoarthritis by modulating IL-6/STAT3 pathway
Source: PubMed Central journal article supplement (PMC8478978; doi:10.1038/s41419-021-04170-0), 2021-09-28
Supplement: 41419_2021_4170_MOESM1_ESM.pdf [file 41419_2021_4170_MOESM1_ESM.pdf]

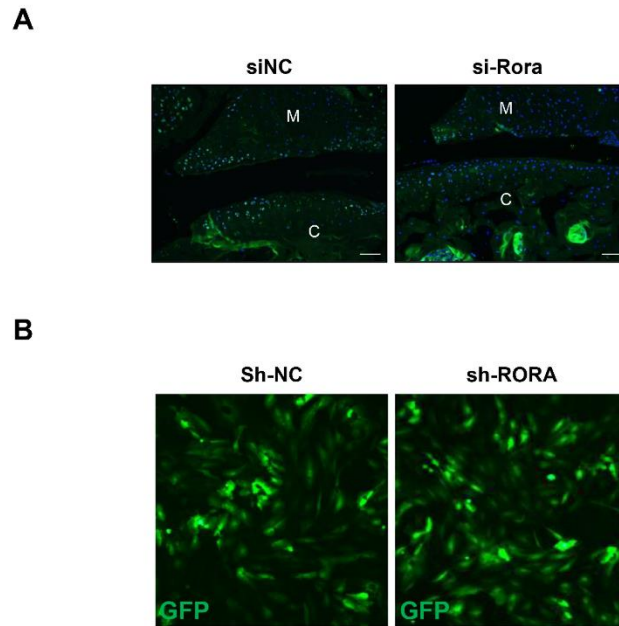

**Supplementary Figure 1 The infection efficiency in vivo and in vitro. (A)** The immunofluorescence image of ROR $\alpha$  (green) and DAPI (blue) 5 days after intra-articular injection of si -Rora or si-NC; M, meniscus; AC, articular cartilage. Scale bars, 100 $\mu$ m. **(B)** Fluorescence of GFP in human chondrocyte infected with sh-RORA or sh-NC lentivirus at 80 MOI separately.

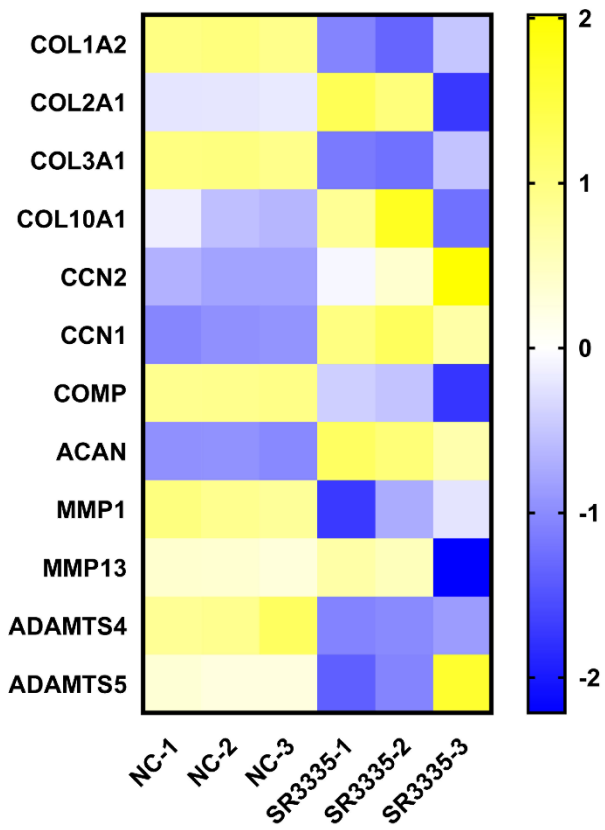

**Supplementary Figure 2 The heat map for certain genes after SR3335 treatment.**

The relative expression of COL1A2, COL2A1, COL3A1, COL10A1, CCN2, CCN1, COMP, ACAN, MMP1, MMP13, ADAMTS4, and ADAMTS5 was shown.

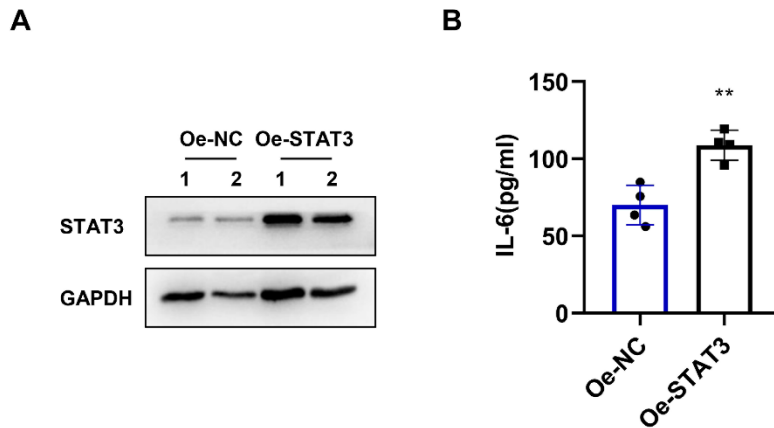

**Supplementary Figure 3 The concentration of IL-6 after overexpressing STAT3.**

**(A)** The chondrocytes were transfected with STAT3 overexpression plasmid and control plasmid for 48 h. The expression level of STAT3 protein was detected with Western blot. **(B)** ELISA assay to detect IL-6 protein expression after transfected with STAT3 overexpression or control plasmid for 48 h.  $n = 4$  independent experiments. Data in **(B)** are presented as mean  $\pm$  SD. The statistical data in **(B)** was analyzed with Student's  $t$  test. \*\*  $P < 0.01$ . All data shown above are presented as mean  $\pm$  SD.

**Supplementary Table 1 Primer sequence used in this study**

| Gene           | Forward/<br>Reverse | Primer sequence (5'-3')  |
|----------------|---------------------|--------------------------|
| <i>RORA</i>    | Forward             | ACTCCTGTCCTCGTCAGAAGA    |
|                | Reverse             | CATCCCTACGGCAAGGCATTT    |
| <i>COL2A1</i>  | Forward             | GGCAATAGCAGGTTACGTACA    |
|                | Reverse             | CGATAACAGTCTTGCCCCACTT   |
| <i>ACAN</i>    | Forward             | TGCATTCCACGAAGCTAACCTT   |
|                | Reverse             | GACGCCTCGCCTTCTTGAA      |
| <i>COL10A1</i> | Forward             | CAAGGCACCATCTCCAGGAA     |
|                | Reverse             | AAAGGGTATTTGTGGCAGCATATT |
| <i>SOX9</i>    | Forward             | AGCGAACGCACATCAAGAC      |
|                | Reverse             | GCTGTAGTGTGGGAGGTTGAA    |
| <i>MMP13</i>   | Forward             | CCAGACTTCACGATGGCATTG    |
|                | Reverse             | GGCATCTCCTCCATAATTTGGC   |
| <i>ADAMTS4</i> | Forward             | GAGGAGGAGATCGTGTTTCCA    |
|                | Reverse             | CCAGCTCTAGTAGCAGCGTC     |
| <i>ADAMTS5</i> | Forward             | GAACATCGACCAACTCTACTCCG  |
|                | Reverse             | CAATGCCACCGAACCATCT      |
| <i>IL6</i>     | Forward             | ACTCACCTCTTCAGAACGAATTG  |
|                | Reverse             | CCATCTTTGGAAGGTTTCAGGTTG |
| <i>IL6R</i>    | Forward             | CCCCTCAGCAATGTTGTTTGT    |
|                | Reverse             | CTCCGGGACTGCTAACTGG      |
| <i>STAT3</i>   | Forward             | CAGCAGCTTGACACACGGTA     |
|                | Reverse             | AAACACCAAAGTGGCATGTGA    |
| <i>SOCS3</i>   | Forward             | CCTGCGCCTCAAGACCTTC      |
|                | Reverse             | GTCACTGCGCTCCAGTAGAA     |
| <i>JAK2</i>    | Forward             | TCTGGGGAGTATGTTGCAGAA    |
|                | Reverse             | AGACATGGTTGGGTGGATAACC   |
| <i>IL1B</i>    | Forward             | AGCTACGAATCTCCGACCAC     |
|                | Reverse             | CGTTATCCCATGTGTCGAAGAA   |
| <i>IL17A</i>   | Forward             | TCCCACGAAATCCAGGATGC     |
|                | Reverse             | GGATGTTTCAGGTTGACCATCAC  |
| <i>TNF</i>     | Forward             | CCTCTCTCTAATCAGCCCTCTG   |
|                | Reverse             | GAGGACCTGGGAGTAGATGAG    |
| <i>GAPDH</i>   | Forward             | AGAAAACCTGCCAAATATGATGAC |

---

Reverse

TGGGTGTCGCTGTTGAAGTC

---

**Supplementary Table 2 Oligo sequence used in this study**

| Oligo     | Forward/<br>Reverse | Primer sequence (5'-3')                                        |
|-----------|---------------------|----------------------------------------------------------------|
| Si-Rora-1 | Forward             | CCGGGCGCAGGCAGAGCTATGCGAGCTCG<br>AGCTCGCATAGCTCTGCCTGCGCTTTTTG |
|           | Reverse             | AATTCAAAAAGCGCAGGCAGAGCTATGCG<br>AGCTCGAGCTCGCATAGCTCTGCCTGCGC |
| Si-Rora-2 | Forward             | CCGGCAGGCAGAGCTATGCGAGCTCCTCG<br>AGGAGCTCGCATAGCTCTGCCTGTTTTG  |
|           | Reverse             | AATTCAAAAACAGGCAGAGCTATGCGAGC<br>TCCTCGAGGAGCTCGCATAGCTCTGCCTG |
| Si-Rora-3 | Forward             | CCGGGCTATGCGAGCTCCAGCCGAGCTCG<br>AGCTCGGCTGGAGCTCGCATAGCTTTTTG |
|           | Reverse             | AATTCAAAAAGCTATGCGAGCTCCAGCCG<br>AGCTCGAGCTCGGCTGGAGCTCGCATAGC |
| Sh-RORA-1 | /                   | GGAGAAGTCAGCAAAGCAATGCTCGAGC<br>ATTGCTTTGCTGACTTCTCC           |
| Sh-RORA-2 | /                   | GCAGAGAGACAGCTTGTATGCCTCGAGGC<br>ATACAAGCTGTCTCTCTGC           |
| Sh-RORA-3 | /                   | AAACGTGACACGTTCCGGAGAACGAATTCT<br>CCGAACGTGTCACGTTT            |
